# Supplementary material
Source: PubMed Central journal article supplement (PMC3753670)
Supplement: NIHMS496383-supplement-01.pdf [file NIHMS496383-supplement-01.pdf]

## Supplemental information

# The NAD<sup>+</sup>/sirtuin pathway modulates longevity through activation of mitochondrial UPR and FOXO signaling

Laurent Mouchiroud<sup>1\*</sup>, Riekelt H. Houtkooper<sup>1,2\*</sup>, Norman Moullan<sup>1</sup>, Elena Katsyuba<sup>1</sup>, Dongryeol Ryu<sup>1</sup>, Carles Cantó<sup>1§</sup>, Young-Suk Jo<sup>1</sup>, Adrienne Mottis<sup>1</sup>, Mohan Viswanathan<sup>3</sup>, Kristina Schoonjans<sup>1</sup>, Leonard Guarente<sup>3</sup>, Johan Auwerx<sup>1#</sup>

## Supplementary data

Table S1, related to Figures 1D-I, 2B, 3E-F, 4H, 5A, 5C-D, 5H

Table S2, related to Figures S2

Table S3, related to experimental procedures

Figure S1, related to Figure 1

Figure S2, related to Figures 1 and 2

Figure S3, related to Figure 2

Figure S4, related to Figures 3 and 4

Figure S5, related to Figure 4

Figure S6, related to Figure 7

## Extended experimental procedures

### *C. elegans* strains and RNAi experiments

*C. elegans* strains were cultured at 20°C on nematode growth media agar plates seeded with *E. coli* strain OP50 unless stated otherwise. Strains used were wild-type Bristol N2, RB1042 *pme-1(ok988)* I, CF1038 *daf-16(mu86)* I, CF1139 *daf-16(mu86)* I; muEx50[*daf16::GFP*(pKL78) + *rol-6*(pRF4)], VC199 *sir-2.1(ok434)* IV, KN259 (huls33[*sod-3::GFP* + pRF4(*rol-6*(su1006))]), MV390(*gels101*(*rol-6*(su1006))), MV389(*gels3*(P<sub>int</sub>*sir-2.1*(+),(*rol-6*(su1006))), NL2099 *rff-3(pk1426)* II, SJ4100 (zcls13[*hsp-6::GFP*]), SJ4103 (zcls14[*myo-3::GFP*(mit)]) and SJ4005 (zcls4[*hsp-4::GFP*]). Strains were provided by the *Caenorhabditis* Genetics Center (University of Minnesota). MV390 and MV389 strains were outcrossed six times and were wild type for the dye-filling (*dyf*) mutation (Viswanathan and Guarente, 2011). *pme-1(ok988)* were outcrossed two times with N2 wild type worms.

Bacterial feeding RNAi experiments were carried out as described (Kamath et al., 2001). Clones used were *daf-16* (R13H8.1), *pme-1* (Y71F9AL.18), *qns-1* (C24F3.4), *sir-2.1* (R11A8.4) and *ubl-5* (F46F11.4). Clones were purchased from GeneService and sequenced.

### Worm lifespan analysis and stress resistance assays

Lifespan tests were performed as described (Mouchiroud et al., 2011). Briefly, 60-100 animals were used per conditions and scored every other day. All lifespan experiments were performed at 20°C unless stated otherwise. Animals that crawled off the plate or had an «exploded vulva» phenotype were censored.

Treatments with PARP inhibitors— AZD2281 (also known as KU59436, olaparib), and ABT-888 (also known as veliparib)—or NAD<sup>+</sup> precursors—nicotinamide riboside (NR) and nicotinamide (NAM)— were added at the indicated concentration just before pouring the plates. Animals were exposed to compounds during the full life from eggs until death. To ensure a permanent exposure to the compound, plates were changed twice a week. All the compounds used in this study were dissolved in a water stock solution. Paraquat assay was performed as described (Mouchiroud et al., 2011).

### *Fluorescence analysis*

Quantification of GFP expression and endogenous gut fluorescence were carried out according to the protocol previously described (Yamamoto et al., 2011). Briefly, GFP was monitored in day 1 or day 3 adults. Fluorimetric assays were performed using a Victor X4 multilabel plate reader (Perkin-Elmer Life Science). Eighty worms were picked at random (20 worms per well of a black-walled 96-well plate) and each well was read four times and averaged. Each experiment was repeated at least three times. Endogenous gut fluorescence was monitored at day 1, day 4 and day 8 by following the same protocol as described before.

### *Confocal microscopy and images processing*

Worms were immobilized with 6 mM solution of tetramisole hydrochloride (Sigma) in M9 and mounted on 6% agarose pads on glass slides. Images of worms were acquired using Zeiss LSM 700 Upright confocal microscope (Carl Zeiss AG) under non-saturating exposure conditions. All the snapshots were taken from the same part of *C. elegans*: muscles from the upper part of the worm, excluding the regions of oesophagus and vulva. For each condition multiple worms were observed and imaged. Image processing was performed with the Fiji software (<http://imagej.nih.gov/ij>; version 1.47b). One of the critical issues during the imaging process was the position of the worm, as it influences the level of background. For the uniformity of the represented images, contrast and brightness were adjusted in order to eliminate the undesirable background signal. Neither of these manipulations was affecting the mitochondrial shape. Tracing of the mitochondrial network contour was done by the use of Gaussian blur filter followed by the application of Laplacian operator.

### *MitoSox staining*

MitoSox staining was performed as previously described with slight modification (Yang and Hekimi, 2010). Briefly, a population of 100 worms was recovered in 1 ml of M9 buffer,

washed three times to remove residual bacteria, and resuspended in 200  $\mu$ l of 1:200 MitoSox stock solution (initial stock solution was dissolved at 1mM in DMSO). After 20 minutes of treatment, worms were washed five times in 1ml of M9 buffer to eliminate the MitoSox reagent, and then transferred in a black-walled 96-well plate for reading. Fluorescence produced by the MitoSox reaction was measured as described before (Yamamoto et al., 2011).

#### *Worm respiration assays*

Oxygen consumption was measured using the Seahorse XF96 equipment (Seahorse Bioscience Inc.) as described (Yamamoto et al., 2011). Typically, 100 animals per conditions were recovered from NGM plates with M9 medium, washed three times in 2 mL M9 to eliminate residual bacteria, and resuspended in 500  $\mu$ L M9 medium. Worms were transferred in 96-well standard Seahorse plates (#100777-004) (10 worms per well) and oxygen consumption was measured 6 times. Respiration rates were normalized to the number of worms in each individual well.

#### *Quantitative real-time PCR for mRNA and DNA quantification*

Total RNA was prepared using TRIzol (Invitrogen) according to the manufacturer's instructions. RNA was treated with DNase, and 2  $\mu$ g of RNA was used for reverse transcription (RT). 50X diluted cDNA was used for RT-quantitative PCR (RT-qPCR) reactions. The RT-qPCR reactions were preformed using the Light-Cycler system (Roche Applied Science) and a qPCR Supermix (Qiagen) with the indicated primers. *act-1* and Y45F10D.4 were used as normalization controls. The average of at least three technical repeats was used for each biological data point. Primer sequences are shown in Table S3.

Absolute quantification of the mtDNA copy number in worms was performed by real-time PCR as previously described (Bratic et al., 2010). Relative values for *nd-1* and *act-3* were compared within each sample to generate a ratio representing the relative level of mtDNA per nuclear genome. The results obtained were confirmed with a second mitochondrial gene

MTCE.26. The average of at least three technical repeats was used for each biological data point. Primer sequences are shown in Table S3.

Mitochondrial DNA in mouse cells was quantified as described with slight modifications (Lagouge et al., 2006). Briefly, total DNA was extracted with the Nucleospin tissue kit (Macherey Nagel). Fourty nanograms of total DNA was assessed by real-time PCR using a Light Cycler 480 (Roche). The reaction was performed in a final volume of 8  $\mu$ l with 1x SYBR green master mix (Roche) and 1.25 $\mu$ M of the reverse and forward primers. HK2 primers were used as endogenous control for nuclear DNA and 16s as marker for mitochondrial DNA. Primer sequences are shown in Table S3.

#### *Quantification of ATP levels*

Total ATP content was measured by the CellTiter-Glo luminescent cell viability assays (Promega). Typically, the luminescence was recorded with a Victor X4 plate reader (PerkinElmer) and values are normalized by the total protein concentration determined using a Bradford assay.

#### *NAD measurement by HPLC*

For NAD<sup>+</sup> quantification, approximately 1000 worms were collected in M9 buffer, washed five times to remove residual bacteria and flash-frozen in liquid nitrogen and stored at -80°C until analysis. Extraction was started by adding 250  $\mu$ L of 1.6M perchloric acid to frozen samples, followed by extensive homogenization in a Qiagen tissuelyser, and centrifugation at 20.000g for 15 min. The supernatant was recovered and neutralized with a 3M potassium carbonate solution. After centrifugation, 100  $\mu$ l of supernatant was filtered and used for NAD measurement using an HPLC system (Agilent) with a Supelco LC-18-T column (Sigma), as described (Yoshino et al., 2011).

#### *Generation of Sirt1 floxed (*Sirt1*<sup>L2/L2</sup>) mice*

For the generation of *Sirt1* floxed (*Sirt1*<sup>L2/L2</sup>) mice, genomic DNA covering the *Sirt1* locus was amplified from the 129Sv strain by using high-fidelity PCR. The resulting DNA fragments were assembled into the targeting vector of the Institut Clinique de la Souris (Strasbourg, France). The construct in which exons 5, 6 and 7 were flanked by LoxP sites was then electroporated into 129Sv embryonic stem (ES) cells. G418-resistant colonies were selected and analyzed for homologous recombination by PCR and positive clones were verified by Southern blot hybridization. The karyotype was verified and several correctly targeted ES cell clones were injected into blastocysts from C57BL/6J mice. These blastocysts were transferred into pseudopregnant females, resulting in chimeric offspring that were mated to female C57BL/6J mice that express the Flp recombinase under the control of the ubiquitous cytomegalovirus promoter (Rodriguez et al., 2000). Offspring that transmitted the mutated allele, in which the selection marker was excised, and that lost the Flp transgene (*Sirt1*<sup>L2/WT</sup> mice) were then selected, and backcrossed to C57BL/6J mice for ten generations.

### *Cell experiments*

Primary hepatocytes were isolated using collagenase perfusion as described previously with minor modifications (Dentin et al., 2004; Oosterveer et al., 2012). Hepatocytes from *Sirt1*<sup>L2/L2</sup> (generation of mice - see above) or C57BL/6J mice were plated in DMEM 1 g/L glucose with 10% FBS. Four hours after plating on separate dishes, hepatocytes isolated from a single congenic 10-week-old C57BL/6J male *Sirt1*<sup>L2/L2</sup> mouse were transduced either with an Ad-GFP or an Ad-Cre virus at a MOI=5 to generate matched *Sirt1*<sup>+/+</sup> (wild type) and *Sirt1*<sup>-/-</sup> (knock-out) hepatocytes, respectively. After overnight infection, culture medium was removed and *Sirt1*<sup>+/+</sup> and *Sirt1*<sup>-/-</sup> hepatocytes cultures were treated or not with NR or AZD2281. To obtain gain-of-Sirt1-function hepatocytes, Ad-mSirt1 (Adgene 8438) or Ad-GFP virus was used at the same MOI to infect primary hepatocytes obtained from a 10-week-old male C57BL/6J mouse to generate hepatocytes overexpressing *Sirt1* and GFP (control hepatocytes), respectively.

The mouse hepatocytes cell line AML-12 (alpha mouse liver 12) was obtained from ATCC and grown at 37°C in a humidified atmosphere of 5% CO<sub>2</sub>/95% air in Dulbecco's Modified Eagle Medium / Nutrient Mixture F-12 (DMEM/F-12) supplemented with 0.005 mg/ml insulin, 0.005 mg/ml transferrin, 5 ng/ml selenium, 40 ng/ml dexamethasone, and 10% fetal bovine serum without antibiotics.

Cells were collected after 48 hours treatment in ice-cold RIPA buffer, containing 25 mM Tris, pH7.4, 150 mM NaCl, 1% (v/v) NP-40, 1% (w/v) sodium deoxycholate, 0.1% (w/v) SDS). NR was dissolved in water and AZD in DMSO.

#### *Superoxide dismutase activity*

AML12 cells were lysed in a buffer (150 mM NaCl, 0.5% sodium deoxycholate, 0.1% SDS, and 50 mM Tris, pH 8.0) with protease inhibitors. Total protein concentration was determined using the Bradford assay. The protein lysates were normalized to 1ug/uL. SOD activity was determined at indicated times after NR and AZD treatment by the SOD Assay Kit (Cayman Chemical) according to the manufacturer's instructions. Absorbance was determined with a Victor X4 multilabel plate reader (Perkin-Elmer Life Science) at 450 nm. Results are expressed in U/ml according to the standard curve.

#### *Hsp60 and Mfn2 luciferase reporter assays*

Human Hsp60 (-603 to +735 for Hsp60) and Mfn2 promoter fragments (-805 to +424 for Mfn2) were amplified and ligated into the pGL3 basic luciferase reporter vector (Promega, Madison, Wisconsin, USA). Primers used are HSP60-forward (5'-GACA ACGCGTAACAAAAGAGGGGCGTCAG-3'), HSP60-reverse (5'-GACACTCGAGCCCT GAGAAACCAAGTCAGC-3'), MFN2-forward (5'-GACAGGTACCCCTCCCGAGT GCACTATCAT -3') and MFN2-reverse (5'-GACA GCTAGC GCTTGACTGCATCCCAGAC -3'). The primers were tailed with MluI site (forward) and XhoI site (reverse) for Hsp60, KpnI site (forward) and NheI site (reverse) for Mfn2. Transfections of the mouse hepatocyte cell line AML-12 with these Hsp60 and Mfn2 luciferase reporters were performed in 96-well

plates using jetPEI (PolyPlus). Each well contained 30 ng of luciferase reporter and 10 ng of Renilla expression plasmid (Promega). After 6h of incubation with the DNA–jetPEI complexes, the transfection medium was exchanged for medium with or without NR and AZD. Luciferase and Renilla activity were measured with the Dual Glo luciferase assay system (Promega) in the Victor X4 (PerkinElmer).

#### *Western blot*

Poly(ADP-Ribose) detection was performed as previously described with slight modifications (Bai et al., 2011). Briefly, PAR was detected by using a monoclonal anti-PAR antibody (Alexis, Lausanne Switzerland) by Western blotting of total protein lysates, using either 50 µg of total worm protein lysates, 50 µg of liver protein lysate or 200 µg of muscle total protein extracts. PGC-1 $\alpha$  acetylation was determined using PGC-1 $\alpha$  immunoprecipitates from 2 mg of protein extracts, as described (Canto et al., 2009). Other immunoblots were performed with antibodies against, HSP60 (Santa Cruz Biotechnology), HSP90 (BD Transduction Laboratories), CLPP (Sigma Aldrich), SOD2 (Santa Cruz Biotechnology),  $\beta$ -actin, (Santa Cruz Biotechnology), ATP5A (H28O16.1 in worms; Abcam) and MTCO1/COX1 (MTCE.26 in worms; Abcam), and HRP-labeled anti-goat and anti-mouse secondary antibodies (Jackson Laboratory),

#### *Statistics*

Survival analyses were performed using the Kaplan Meier method and the significance of differences between survival curves calculated using the log rank test. Differences between two groups were assessed using two-tailed t-tests. To compare the interaction between age and genotype, two-way ANOVA tests were performed. Analysis of variance, assessed by Bonferroni's multiple comparison test, was used when comparing more than two groups. We used R (R software version 2.9.0) for the calculation of mean lifespan and SEM, and



GraphPad Prism 5 (GraphPad Software, Inc.) for all other statistical analyses. All p-values <0.05 were considered significant.

**Table S1. Summary of lifespan experiments**

| strains and culture conditions    | mean lifespan ± SE (days) | variation compared to control (%) | P-values against control | N(trials) |
|-----------------------------------|---------------------------|-----------------------------------|--------------------------|-----------|
| N2                                | 14,6 ± 0,52               |                                   |                          | 75/5(1)   |
| N2 +paraquat 4mM                  | 5,5 ± 0,11                | - 62,3                            | <10 <sup>-3</sup>        | 78/2(1)   |
| <i>rrf-3(pk1426)</i> empty vector | 20,5 ± 0,82               |                                   |                          | 56/24(1)  |
| <i>rrf-3(pk1426) qns-1</i>        | 14,4 ± 0,57               | - 29,7                            | <10 <sup>-3</sup>        | 66/14(1)  |
| N2                                | 19,7 ± 0,61               |                                   |                          | 96/24(2)  |
| <i>pme-1(ok988)</i>               | 25,5 ± 0,52               | + 29,4                            | <10 <sup>-3</sup>        | 91/29(2)  |
| N2                                | 15,7 ± 0,57               |                                   |                          | 52/8(1)   |
| <i>pme-1(ok988)</i> *             | 19,2 ± 0,53               | + 22,3                            | 0.0001                   | 51/9(1)   |
| <i>rrf-3(pk1426)</i> empty vector | 10,3 ± 0,40               |                                   |                          | 56/4(1)   |
| <i>rrf-3(pk1426) pme-1</i> **     | 12,0 ± 0,48               | + 16,5                            | 0.0016                   | 51/9(1)   |
| N2 +water                         | 20,1 ± 0,59               |                                   |                          | 138/42(3) |
| N2 +AZD 100nM                     | 24,7 ± 0,55               | + 22,9                            | <10 <sup>-3</sup>        | 141/39(3) |
| N2 +water                         | 17,0 ± 0,58               |                                   |                          | 126/14(2) |
| N2 +ABT 100nM                     | 19,8 ± 0,64               | + 16,5                            | 0.0007                   | 120/20(2) |
| N2 +water                         | 19,8 ± 0,87               |                                   |                          | 53/7(1)   |
| <i>pme-1(ok988)</i> +water        | 27,2 ± 0,55               | + 37,4                            | <10 <sup>-3</sup>        | 49/11(1)  |
| N2 +AZD 100 nM                    | 22,8 ± 0,9                | + 15,2                            | 0,02                     | 48/12(1)  |
| <i>pme-1(ok988)</i> +AZD 100nM    | 26,1 ± 0,78               | + 31,2                            | ns <sup>a</sup>          | 49/11(1)  |
| N2 +water                         | 18,5 ± 0,54               |                                   |                          | 121/19(2) |
| N2 +NAM 200µM                     | 22,3 ± 0,68               | + 20,5                            | <10 <sup>-3</sup>        | 95/45(2)  |
| N2 +water                         | 19,5 ± 0,51               |                                   |                          | 188/52(4) |
| N2 +NR 500µM                      | 23,5 ± 0,56               | + 20,1                            | <10 <sup>-3</sup>        | 172/68(4) |
| N2 +water                         | 16,1 ± 0,64               |                                   |                          | 75/5(1)   |
| N2 +AZD 100nM                     | 19,7 ± 0,79               | + 22,3                            | 0,0004                   | 71/9(1)   |
| N2 + NR 500µM                     | 18,7 ± 0,80               | + 16,1                            | 0,01                     | 69/11(1)  |
| N2 +AZD +NR                       | 18,6 ± 0,74               | + 15,5                            | 0,02                     | 63/17(1)  |
| N2 +water                         | 20,1 ± 0,64               |                                   |                          | 74/6(1)   |
| N2 +AZD 10nM                      | 21,5 ± 0,65               | + 6,9                             | ns                       | 76/4(1)   |
| N2 + NR 100µM                     | 21,1 ± 0,68               | + 4,9                             | ns                       | 75/5(1)   |
| N2 +AZD +NR                       | 22,3 ± 0,66               | + 11,0                            | 0,01                     | 70/10(1)  |
| N2 +water                         | 20,5 ± 0,737              |                                   |                          | 83/37(2)  |
| <i>sir-2.1(ok434)</i> +water      | 22,9 ± 0,624              | + 11,7                            | ns                       | 88/32(2)  |
| N2 +AZD 100nM                     | 24,7 ± 0,669              | + 20,5                            | <10 <sup>-3</sup>        | 89/31(2)  |
| <i>sir-2.1(ok434)</i> +AZD 100nM  | 21,9 ± 0,528              | + 6,7                             | ns <sup>b</sup>          | 84/36(2)  |
| N2 +water                         | 20,7 ± 0,80               |                                   |                          | 79/41(2)  |
| <i>sir-2.1(ok434)</i> +water      | 23,4 ± 0,67               | + 13,0                            | ns                       | 80/40(2)  |
| N2 +NR 500µM                      | 24,9 ± 0,68               | + 20,3                            | 0,0008                   | 86/34(2)  |
| <i>sir-2.1(ok434)</i> +NR 500µM   | 23,2 ± 0,61               | + 12,0                            | ns <sup>b</sup>          | 76/44(2)  |
| N2 +water empty vector            | 20,0 ± 0,62               |                                   |                          | 40/40(1)  |
| N2 +AZD empty vector              | 22,0 ± 0,50               | + 10,0                            | 0,0076                   | 36/44(1)  |
| N2 +water <i>ubl-5</i> RNAi       | 16,9 ± 0,64               | - 15,5                            | 0,0011                   | 47/33(1)  |
| N2 +AZD <i>ubl-5</i> RNAi         | 16,7 ± 0,62               | - 16,5                            | <10 <sup>-3c</sup>       | 47/33(1)  |

|                                |             |        |                     |           |
|--------------------------------|-------------|--------|---------------------|-----------|
| N2 +water empty vector         | 17,5 ± 0,67 |        |                     | 51/29(1)  |
| N2 +NR empty vector            | 20,6 ± 0,63 | + 17,7 | 0,0006              | 30/50(1)  |
| N2 +water <i>ubl-5</i> RNAi    | 17,6 ± 0,57 | + 0,5  | ns                  | 45/35(1)  |
| N2 +NR <i>ubl-5</i> RNAi       | 16,9 ± 0,61 | - 3,4  | <10 <sup>-3 d</sup> | 50/30(1)  |
| N2 +water                      | 21,7 ± 1,24 |        |                     | 30/30(1)  |
| <i>daf-16(mu86)</i> +water     | 17,5 ± 0,69 | - 19,3 | 0,0009              | 36/24(1)  |
| N2 +AZD 100nM                  | 26,5 ± 0,77 | + 22,1 | 0,004               | 41/19(1)  |
| <i>daf-16(mu86)</i> +AZD 100nM | 18,2 ± 0,76 | - 16,1 | ns <sup>e</sup>     | 37/23(1)  |
| N2 +water                      | 20,7 ± 0,80 |        |                     | 79/41(2)  |
| <i>daf-16(mu86)</i> +water     | 17,1 ± 0,47 | - 17,4 | <10 <sup>-3</sup>   | 76/44(2)  |
| N2 +NR 500μM                   | 24,9 ± 0,68 | + 20,3 | 0,0008              | 86/34(2)  |
| <i>daf-16(mu86)</i> +NR 500μM  | 19,1 ± 0,51 | - 7,8  | 0,01 <sup>e</sup>   | 88/32(2)  |
| MV390 +water                   | 17,6 ± 0,61 |        |                     | 98/22(2)  |
| MV389 +water                   | 23,0 ± 0,57 | + 30,7 | <10 <sup>-3</sup>   | 106/14(2) |
| MV390 +NR 500μM                | 20,1 ± 0,61 | + 14,2 | 0,0081              | 89/51(2)  |
| MV389 +NR 500μM                | 23,6 ± 0,54 | + 34,1 | <10 <sup>-3</sup>   | 92/48(2)  |
| MV390 empty vector             | 18,9 ± 0,63 |        |                     | 51/29(1)  |
| MV389 empty vector             | 24,7 ± 0,55 | + 30,7 | <10 <sup>-3</sup>   | 30/50(1)  |
| MV390 <i>sir-2.1</i> RNAi      | 18,5 ± 0,65 | - 2,1  | ns                  | 45/35(1)  |
| MV389 <i>sir-2.1</i> RNAi      | 20,8 ± 0,69 | + 10,0 | 0,0004 <sup>†</sup> | 50/30(1)  |
| MV390 <i>daf-16</i> RNAi       | 14,8 ± 0,44 | - 21,7 | <10 <sup>-3</sup>   | 42/38(1)  |
| MV389 <i>daf-16</i> RNAi       | 16,0 ± 0,41 | - 15,3 | <10 <sup>-3 f</sup> | 47/33(1)  |
| MV390 empty vector             | 17,6 ± 0,56 |        |                     | 95/45(2)  |
| MV389 empty vector             | 23,7 ± 0,56 | + 34,7 | <10 <sup>-3</sup>   | 94/46(2)  |
| MV390 <i>ubl-5</i> RNAi        | 17,8 ± 0,47 | + 1,1  | ns                  | 94/46(2)  |
| MV389 <i>ubl-5</i> RNAi        | 19,9 ± 0,52 | + 13,0 | <10 <sup>-3 †</sup> | 97/43(2)  |

**Table S2. Summary of lifespan experiments**

| strains and culture conditions | mean lifespan $\pm$ SE (days) | variation compared to control (%) | <i>P</i> -values against control | N(trials)  |
|--------------------------------|-------------------------------|-----------------------------------|----------------------------------|------------|
| N2 +water                      | 18,3 $\pm$ 0,54               |                                   |                                  | 122/18(2)  |
| N2 +AZD 100nM                  | 22,5 $\pm$ 0,62               | + 22,9                            | <10 <sup>-3</sup>                | 112/28(2)  |
| N2 +AZD 500nM                  | 20,6 $\pm$ 0,60               | + 12,5                            | 0,008                            | 112/28(2)  |
| N2 +AZD 1000nM                 | 21,2 $\pm$ 0,96               | + 15,8                            | 0,01                             | 53/27(1)   |
| N2 +water                      | 17,0 $\pm$ 0,58               |                                   |                                  | 126/14(2)  |
| N2 +ABT 100nM                  | 19,3 $\pm$ 0,62               | + 13,5                            | 0.02                             | 124/16(2)  |
| N2 +ABT 500nM                  | 19,8 $\pm$ 0,64               | + 16,5                            | 0.0007                           | 120/20(2)  |
| N2 +ABT 1000nM                 | 18,1 $\pm$ 0,66               | + 6,5                             | ns                               | 123/17(2)  |
| N2 +water                      | 17,7 $\pm$ 0,49               |                                   |                                  | 121/19(2)  |
| N2 +NR 200 $\mu$ M             | 20,7 $\pm$ 0,55               | + 16,9                            | <10 <sup>-3</sup>                | 104/36(2)  |
| N2 +NR 500 $\mu$ M             | 20,6 $\pm$ 0,54               | + 16,4                            | <10 <sup>-3</sup>                | 106/34(2)  |
| N2 +NR 1000 $\mu$ M            | 19,8 $\pm$ 0,49               | + 11,8                            | 0,004                            | 123/17(2)  |
| N2 +water                      | 18,5 $\pm$ 0,54               |                                   |                                  | 121/19(2)  |
| N2 +NAM 200 $\mu$ M            | 22,3 $\pm$ 0,68               | + 20,5                            | <10 <sup>-3</sup>                | 95/45(2)   |
| N2 +NAM 500 $\mu$ M            | 22,5 $\pm$ 0,55               | + 21,6                            | <10 <sup>-3</sup>                | 120/20(2)  |
| N2 +NAM 1000 $\mu$ M           | 20,7 $\pm$ 0,51               | + 11,9                            | 0,01                             | 120/120(2) |

**Table S3. Q-RT-PCR primer list**

| Gene name         | Sequence                   |
|-------------------|----------------------------|
| <i>sir-2.1-fw</i> | TTCTTGTGTTGACTGGCGCT       |
| <i>sir-2.1-rv</i> | GTCCTGGGAAGATTTCTCTCG      |
| <i>cts-1-rv</i>   | GGTACAGGTTGCGATAGATGATAGC  |
| <i>cts-1-fw</i>   | CTCGACAACCTCCCAGATAACC     |
| <i>cox-4-rv</i>   | AGGTTGGCGGCAGTTCTGGG       |
| <i>cox-4-fw</i>   | GCCCCAATTCGCGCCAAGGA       |
| <i>hvk-1-rv</i>   | CTAGAGATGACGTCACACACTTCTC  |
| <i>hvk-1-fw</i>   | GTGCGACGAGTACTTTCTCAACTG   |
| <i>pyc-1-rv</i>   | GTGATCATAACATCCTGGTCTACTGC |
| <i>pyc-1-fw</i>   | TCCAACACTCCTCTTGCTACTGAC   |
| <i>fzo-1-rv</i>   | AGTCGGCATTCCCCTGATTCCG     |
| <i>fzo-1-fw</i>   | TCTGCAGGTTGAAGGTTCAGAAGGC  |
| <i>opa-1-rv</i>   | CTTGGCCATCCATTCTGCCCA      |
| <i>opa-1-fw</i>   | TCGCGGCTAGAACGTGGTATGA     |
| <i>drp-1-rv</i>   | ACCGGTTGTAGCTGCGCTCT       |
| <i>drp-1-fw</i>   | AGGCTGAAGCCCACCAATGAGC     |
| <i>prdx-2-rv</i>  | GGGTCGATGATGAAGAGTCCACGG   |
| <i>prdx-2-fw</i>  | TTGTGCTCGCCGCTTCCACC       |
| <i>gst-4-rv</i>   | CCAGCGAGTCCAAATTTCTTGCCA   |
| <i>gst-4-fw</i>   | TGCTCTTGCTGAGCCAATCCGT     |
| <i>sod-1-rv</i>   | ACTGGGGAGCAGCGAGAGCA       |
| <i>sod-1-fw</i>   | CCGACACGCTCGTCACGCTT       |
| <i>sod-2-rv</i>   | TCCTTTGGAGACCGCCTCGTGA     |
| <i>sod-2-fw</i>   | ACAGGAGTCGCTGCTGTTTCGC     |
| <i>hsf-1-rv</i>   | GGTGGATGAGGTGGAAGTCG       |
| <i>hsf-1-fw</i>   | GAATGCGACTAGGCAAATGGC      |
| <i>hsp-4-rv</i>   | TGCTGGCACGGTGACAACGG       |
| <i>hsp-4-fw</i>   | GCACTGGCCGTTCAAGATCGTCCG   |
| <i>sod-3-fw</i>   | CTAAGGATGGTGAACCTTCA       |

|                 |                           |
|-----------------|---------------------------|
| <i>sod-3-rv</i> | CGCGCTTAATAGTGTCCATCAG    |
| <i>hsp-6-fw</i> | AACCACCGTCAACAACGCCG      |
| <i>hsp-6-rv</i> | AGCGATGATCTTATCTCCAGCGTCC |
| <i>act-1-fw</i> | GCTGGACGTGATCTTACTGATTACC |
| <i>act-1-rv</i> | GTAGCAGAGCTTCTCCTTGATGTC  |
| Y45F10D.4-fw    | GTCGCTTCAAATCAGTTCAGC     |
| Y45F10D.4-rv    | GTTCTTGTC AAGTGATCCGACA   |
| HK2-Forward     | GCCAGCCTCTCCTGATTTTAGTGT  |
| HK2-Reverse     | GGGAACACAAAAGACCTCTTCTGG  |
| 16s-Forward     | CCGCAAGGGAAAGATGAAAGAC    |
| 16s-Reverse     | TCGTTTGGTTTCGGGGTTTC      |
| <i>act-3-rv</i> | GGTGGTTCTCCGGAAGAA        |
| <i>act-3-fw</i> | TGCGACATTGATATCCGTAAGG    |
| <i>nd-1-rv</i>  | AAGCTTGTGCTAATCCCATAAATGT |
| <i>nd-1-fw</i>  | AGCGTCATTTATTGGGAAGAAGAC  |
| MTCE.26-rv      | CAGGGTGCCCCATTGTTCTT      |
| MTCE.26-fw      | GGTTGTGGGACTAGGTGAACA     |

## Figure legends

### Figure S1. PARP activity and NAD<sup>+</sup> in aged mammals and worms. Related to Figure 1.

(A) Total protein PARylation was evaluated in liver and muscle of young (6 months) and aged (24 months) C57BL/6J mice, and was accompanied by (B) decreased NAD<sup>+</sup> levels, and (C) PGC-1 $\alpha$  hyperacetylation.

Bar graphs are expressed as mean $\pm$ SEM, \*\*\*  $p\leq 0.001$ .

### Figure S2. Lifespan analyses with different concentrations of PARP inhibitors or NAD<sup>+</sup> precursors. Related to Figures 1 and 2.

(A-B) Worm lifespan was measured after treatment with PARP inhibitors AZD2281 (A) or ABT-888 (B) at the indicated concentrations.

(C-D) Worm lifespan was measured after treatment with NAD<sup>+</sup> precursors NR (C) or NAM (D) at the concentrations indicated.

See Table S1 and S2 for statistics.

### Figure S3. The NAD precursor NAM increases NAD<sup>+</sup> levels, respiration and mitochondrial content. Related to Figure 2.

(A) 100 nM ABT-888 increased NAD<sup>+</sup> levels in *C. elegans* at day 3 of adulthood.

(B) 200  $\mu$ M NAM increased NAD<sup>+</sup> levels in *C. elegans* at day 3 of adulthood.

(C) Oxygen consumption was increased in day 3 adult worms after NAM.

Bar graphs are expressed as mean $\pm$ SEM, \*  $p\leq 0.05$ ; \*\*  $p\leq 0.01$ ; \*\*\*  $p\leq 0.001$

### Figure S4. Early and late phase stress response after *pme-1* RNAi. Related to Figures 3 and 4.

(A) At day 1 of adulthood, *pme-1* RNAi activates UPR<sup>mt</sup> response (*hsp-6::GFP*) but not ROS defense (*sod-3::GFP*).

(B) At day 3 of adulthood, *pme-1* RNAi activates both UPR<sup>mt</sup> response (*hsp-6::GFP*) and ROS defense (*sod-3::GFP*).

Bar graphs are expressed as mean±SEM, \*  $p \leq 0.05$ ; \*\*  $p \leq 0.01$ .

**Figure S5. The NAD precursor NAM induces paraquat resistance and *daf-16* nuclear translocation. Related to Figure 4.**

(A) Supplementation of the NAD<sup>+</sup> precursor NAM (200  $\mu$ M) increases lifespan of wild type N2 worms treated with 4 mM paraquat.

(B) Representative images of *daf-16::GFP* reporter worms treated with either vehicle or NAM, showing nuclear accumulation of *daf-16* following treatment.

(C) Quantification of *daf-16* nuclear translocation following treatment with NAM.

Bar graphs are expressed as mean±SEM, \*\*\*  $p \leq 0.001$ .

**Figure S6. Summary of the role of NAD<sup>+</sup> in lifespan control.**

Scheme summarizing how we hypothesize that NAD<sup>+</sup> precursors and PARP inhibitors increase lifespan through activation of *sir-2.1*, *ubl-5*, and *daf-16*.

In the normal unstressed situation (left panel) *sir-2.1* controls normal lifespan through 1) maintaining normal mitochondrial function, and 2) maintaining proper *daf-16* signaling. If this axis is disturbed, for instance in *sir-2.1* or *daf-16* mutants, lifespan is shortened.

In the *sir-2.1* gain-of-function situation (right panel), achieved by either *sir-2.1* overexpression or increasing the load of its substrate NAD<sup>+</sup> (as happens in caloric restriction) (Canto et al., 2009; Canto et al., 2012; Chen et al., 2008), lifespan is extended. In this situation, *sir-2.1* induces mitochondrial biogenesis leading to mitonuclear protein imbalance, i.e. the production of proteins encoded by nDNA is not matched to that of mtDNA. The mitonuclear protein imbalance induces the protective UPR<sup>mt</sup>, which in turn is essential for longevity. At the same time, the *daf-16/sod-3* pathway is induced to protect against ROS, but it is not fully understood how this pathway is activated.



## Table legends

### Table S1. Summary of lifespan experiments

Summary of mean lifespan and statistical analysis (*P*-values) for lifespan experiments including all RNAi feeding conditions and different treatments displayed in Figures 1D-I, 2B, 3E-F, 4H, 5A, 5C-D, 5H. *P*-values from a log rank test comparing RNAi treatment population to the vector control or to specific groups (<sup>a</sup>versus *pme-1(ok988)* +water; <sup>b</sup>*sir-2.1(ok434)* +water; <sup>c</sup>N2 +AZD empty vector; <sup>d</sup>N2 +NR empty vector; <sup>e</sup>*daf-16(mu86)* +water; <sup>f</sup>MV389 empty vector). *P*-values less than 0,05 are considered statistically significant, demonstrating that the two lifespan populations are different. The total number of individuals scored is shown followed by the total number of censored worms and the total number of independent experiments. \*the *pme-1(ok988)* strain used in this experiment was backcrossed two times and compared with the corresponding wild type. \*\*this experiment was performed at 25°C.

### Table S2. Summary of lifespan experiments using different treatments with AZD, ABT, NR and NAM

Summary of mean lifespans and statistical analysis (*P*-values) for lifespan experiments including different treatments with AZD, ABT, NR and NAM displayed in Figures 1I-J, 2A-B, S2A-D. *P*-values less than 0,05 are considered statistically significant, demonstrating that the two lifespan populations are different. The total number of individuals scored is shown followed by the number of individuals censored due to bursting vulva or crawling off the agar. The total number of individuals scored is shown followed by the total number of independent experiments.

### Table S3. Q-RT-PCR primer list

Summary of Q-RT-PCR primer sequences used for experiments displayed in Figures 2H, 2J, 3B, 4B, 4D, 4D-E, 5B-C, 5G, 6A-B.

## References

- Bai, P., Canto, C., Oudart, H., Brunyanszki, A., Cen, Y., Thomas, C., Yamamoto, H., Huber, A., Kiss, B., Houtkooper, R.H., *et al.* (2011). PARP-1 Inhibition Increases Mitochondrial Metabolism through SIRT1 Activation. *Cell Metab* 13, 461-468.
- Bratic, I., Hench, J., and Trifunovic, A. (2010). *Caenorhabditis elegans* as a model system for mtDNA replication defects. *Methods* 51, 437-443.
- Canto, C., Gerhart-Hines, Z., Feige, J.N., Lagouge, M., Noriega, L., Milne, J.C., Elliott, P.J., Puigserver, P., and Auwerx, J. (2009). AMPK regulates energy expenditure by modulating NAD<sup>+</sup> metabolism and SIRT1 activity. *Nature* 458, 1056-1060.
- Canto, C., Houtkooper, R.H., Pirinen, E., Youn, D.Y., Oosterveer, M.H., Cen, Y., Fernandez-Marcos, P.J., Yamamoto, H., Andreux, P.A., Cettour-Rose, P., *et al.* (2012). The NAD(+) Precursor Nicotinamide Riboside Enhances Oxidative Metabolism and Protects against High-Fat Diet-Induced Obesity. *Cell Metab* 15, 838-847.
- Chen, D., Bruno, J., Easlou, E., Lin, S.J., Cheng, H.L., Alt, F.W., and Guarente, L. (2008). Tissue-specific regulation of SIRT1 by calorie restriction. *Genes Dev* 22, 1753-1757.
- Dentin, R., Pegorier, J.P., Benhamed, F., Fougelle, F., Ferre, P., Fauveau, V., Magnuson, M.A., Girard, J., and Postic, C. (2004). Hepatic glucokinase is required for the synergistic action of ChREBP and SREBP-1c on glycolytic and lipogenic gene expression. *J Biol Chem* 279, 20314-20326.
- Kamath, R.S., Martinez-Campos, M., Zipperlen, P., Fraser, A.G., and Ahringer, J. (2001). Effectiveness of specific RNA-mediated interference through ingested double-stranded RNA in *Caenorhabditis elegans*. *Genome Biol* 2, RESEARCH0002.
- Lagouge, M., Argmann, C., Gerhart-Hines, Z., Meziane, H., Lerin, C., Daussin, F., Messadeq, N., Milne, J., Lambert, P., Elliott, P., *et al.* (2006). Resveratrol improves mitochondrial function and protects against metabolic disease by activating SIRT1 and PGC-1 $\alpha$ . *Cell* 127, 1109-1122.
- Mouchiroud, L., Molin, L., Kasturi, P., Triba, M.N., Dumas, M.E., Wilson, M.C., Halestrap, A.P., Roussel, D., Masse, I., Dalliere, N., *et al.* (2011). Pyruvate imbalance mediates metabolic reprogramming and mimics lifespan extension by dietary restriction in *Caenorhabditis elegans*. *Aging Cell* 10, 39-54.
- Oosterveer, M.H., Matak, C., Yamamoto, H., Harach, T., Moullan, N., van Dijk, T.H., Ayuso, E., Bosch, F., Postic, C., Groen, A.K., *et al.* (2012). LRH-1-dependent glucose sensing determines intermediary metabolism in liver. *J Clin Invest* 122, 2817-2826.

- Rodriguez, C.I., Buchholz, F., Galloway, J., Sequerra, R., Kasper, J., Ayala, R., Stewart, A.F., and Dymecki, S.M. (2000). High-efficiency deleter mice show that FLPe is an alternative to Cre-loxP. *Nat Genet* 25, 139-140.
- Viswanathan, M., and Guarente, L. (2011). Regulation of *Caenorhabditis elegans* lifespan by sir-2.1 transgenes. *Nature* 477, E1-2.
- Yamamoto, H., Williams, E.G., Mouchiroud, L., Cantó, C., Fan, W., Downes, M., Héligon, C., Barish, G.D., Desvergne, B., Evans, R.M., *et al.* (2011). NCoR1 is a conserved physiological modulator of muscle mass and oxidative function. *Cell* 147, 827-839.
- Yang, W., and Hekimi, S. (2010). A mitochondrial superoxide signal triggers increased longevity in *Caenorhabditis elegans*. *PLoS Biol* 8, e1000556.
- Yoshino, J., Mills, K.F., Yoon, M.J., and Imai, S. (2011). Nicotinamide Mononucleotide, a Key NAD(+) Intermediate, Treats the Pathophysiology of Diet- and Age-Induced Diabetes in Mice. *Cell Metab* 14, 528-536.
