# Supplementary material
Source: PubMed Central journal article supplement (PMC3753670)

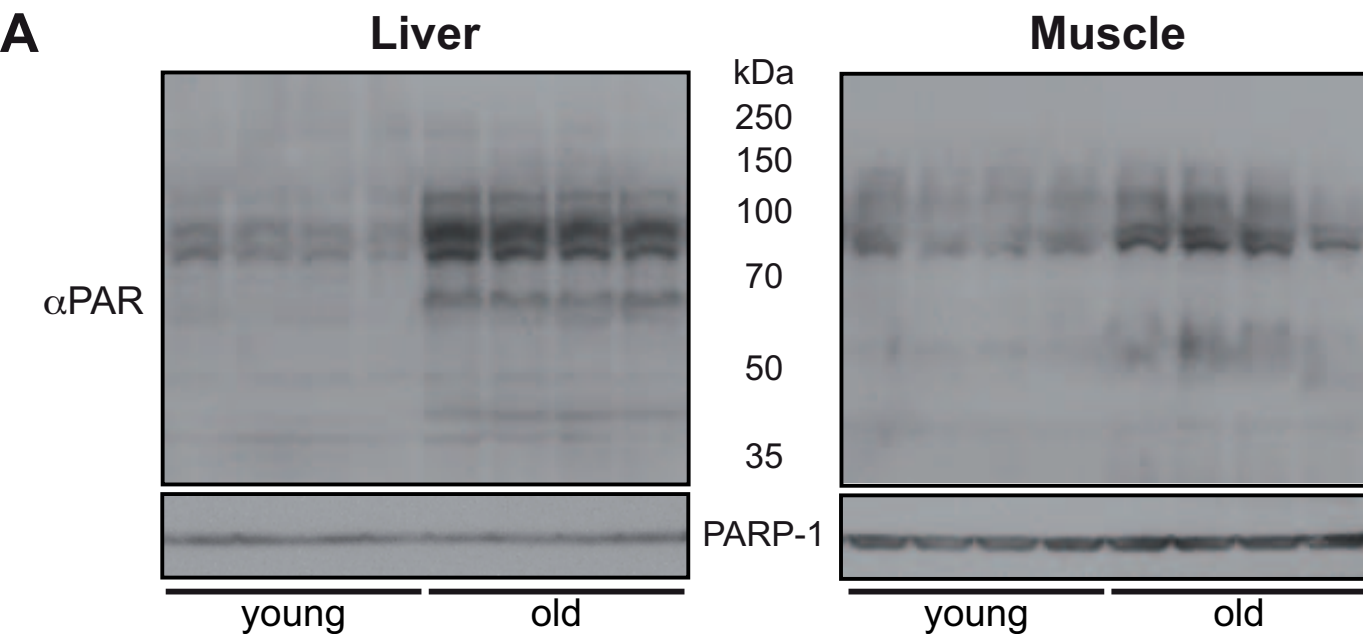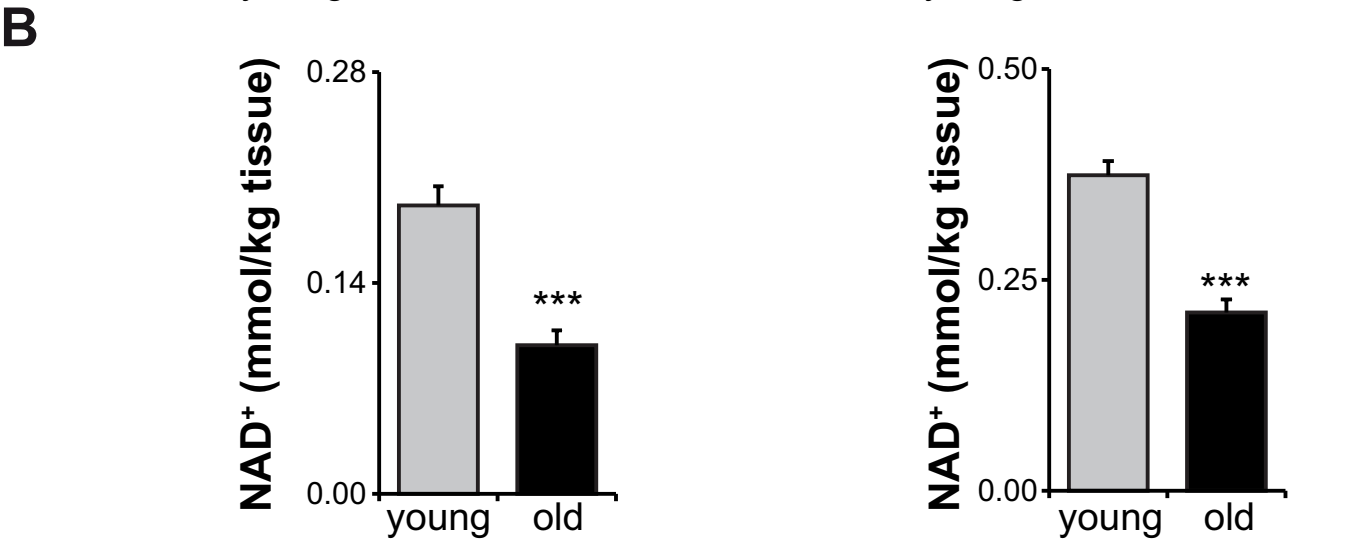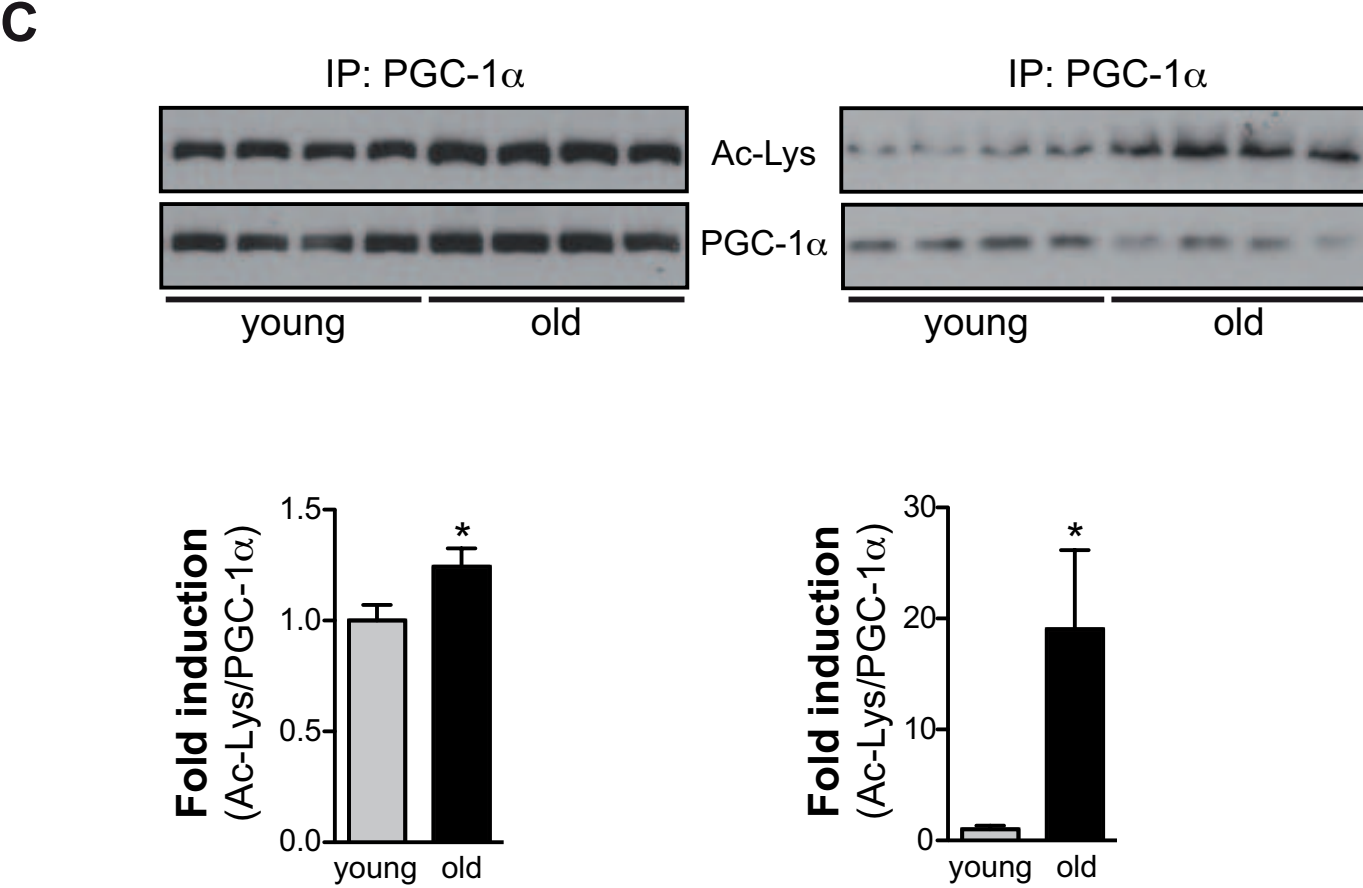

FIGURE S2

A

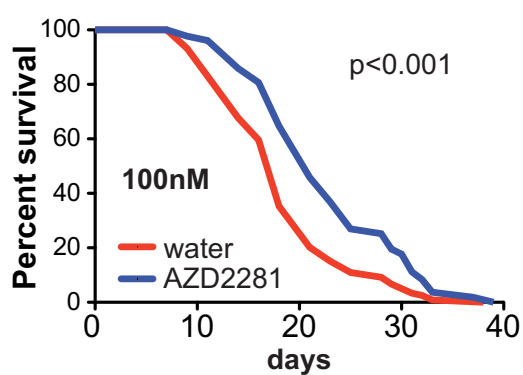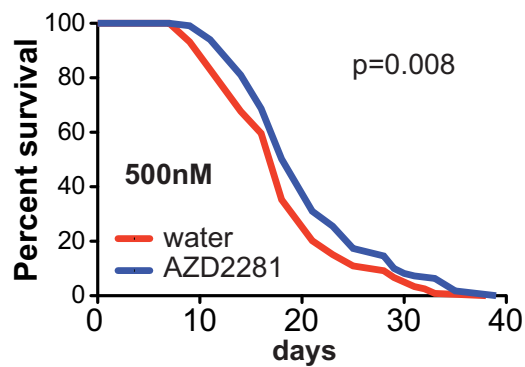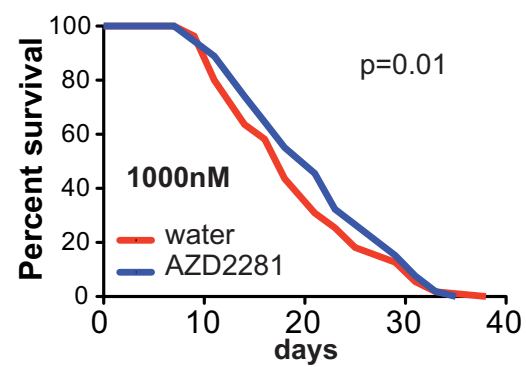

B

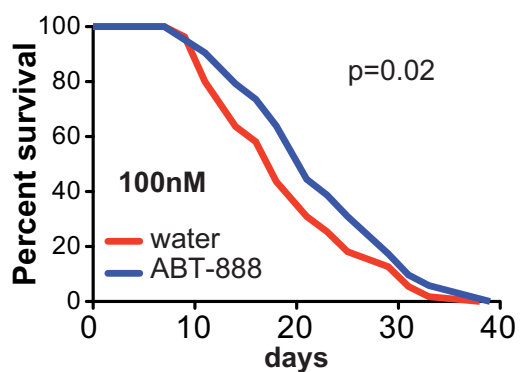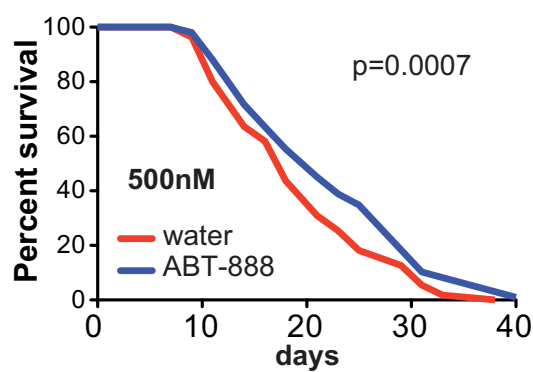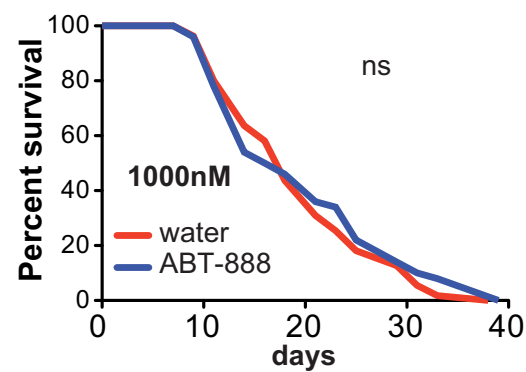

C

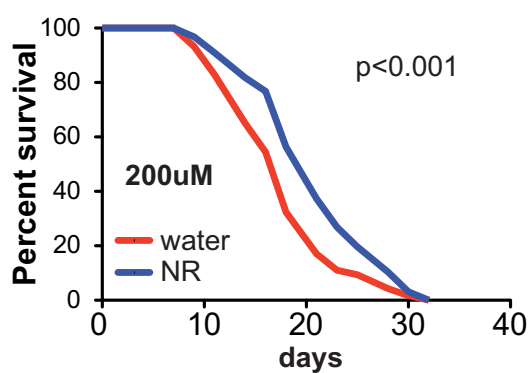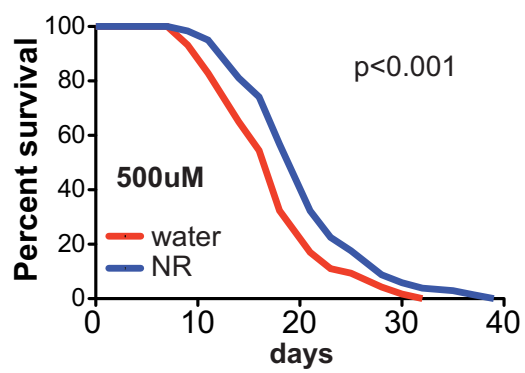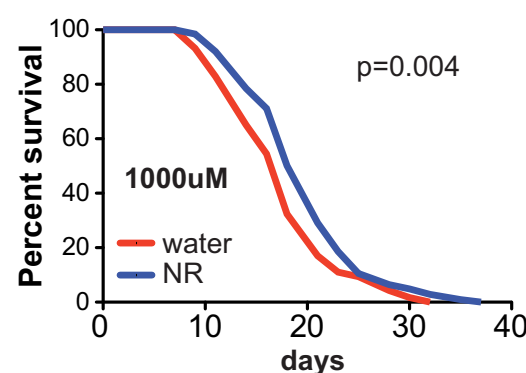

D

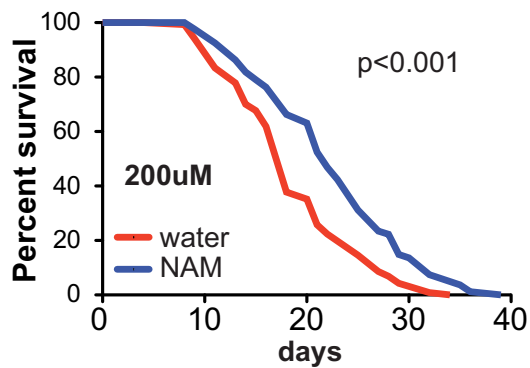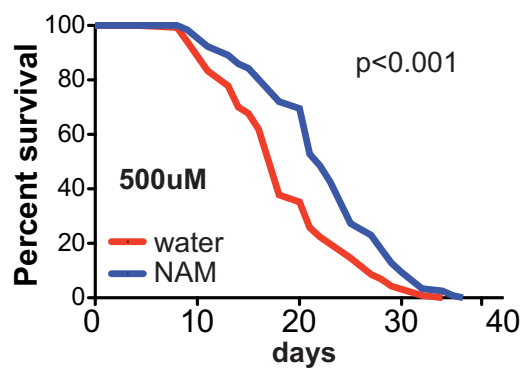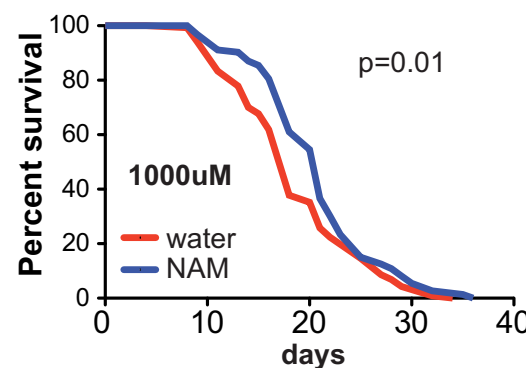

## FIGURE S3

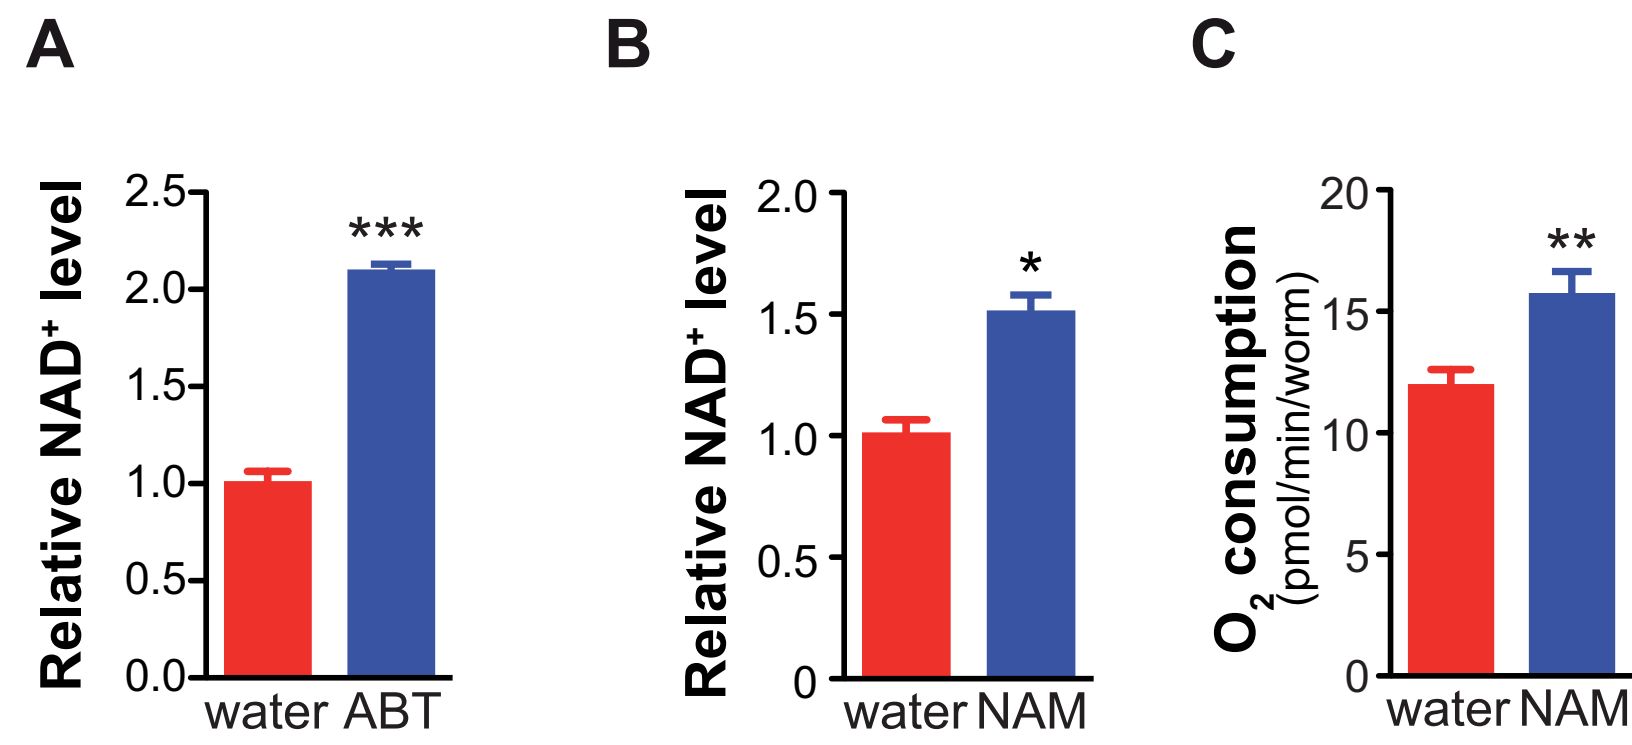

FIGURE S4

A

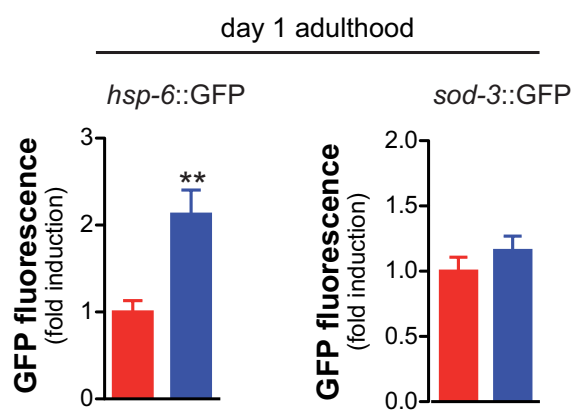

B

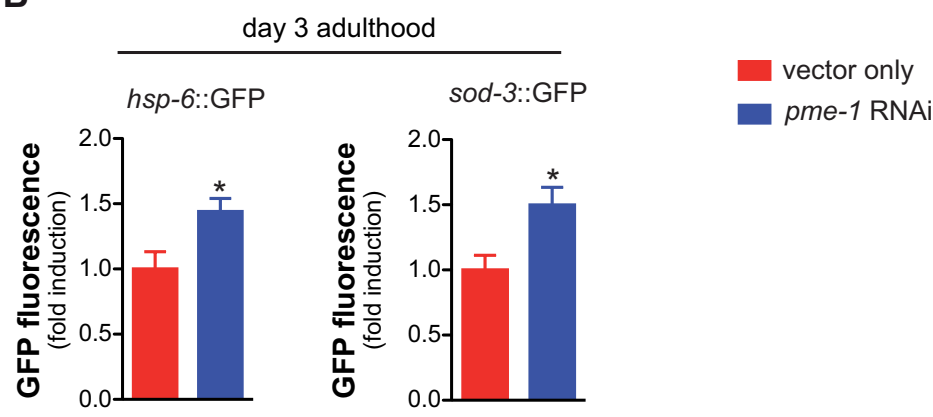

**FIGURE S5**

**A**

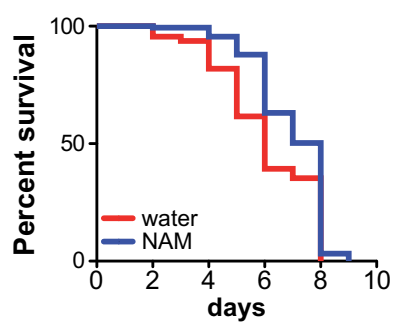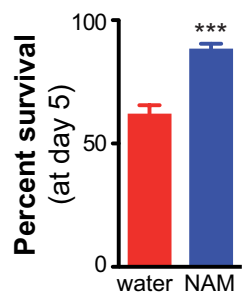

**B**

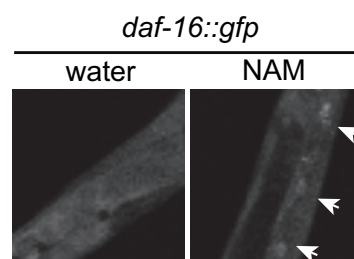

**C**

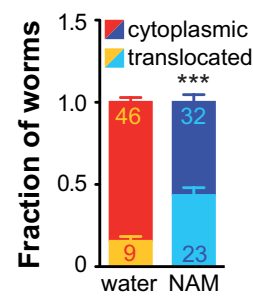

FIGURE S6

Normal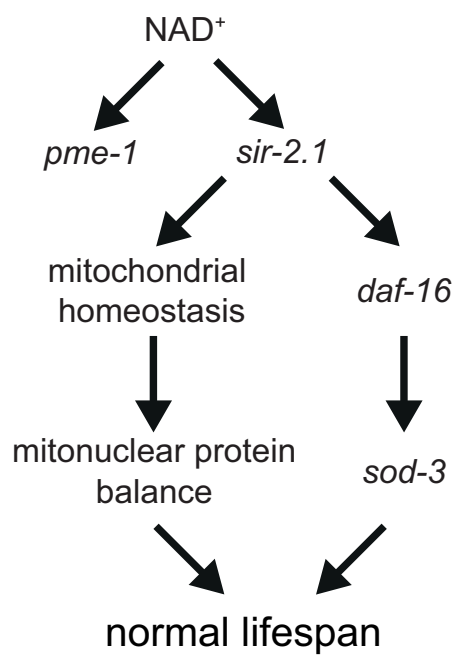*sir-2.1* gain-of-function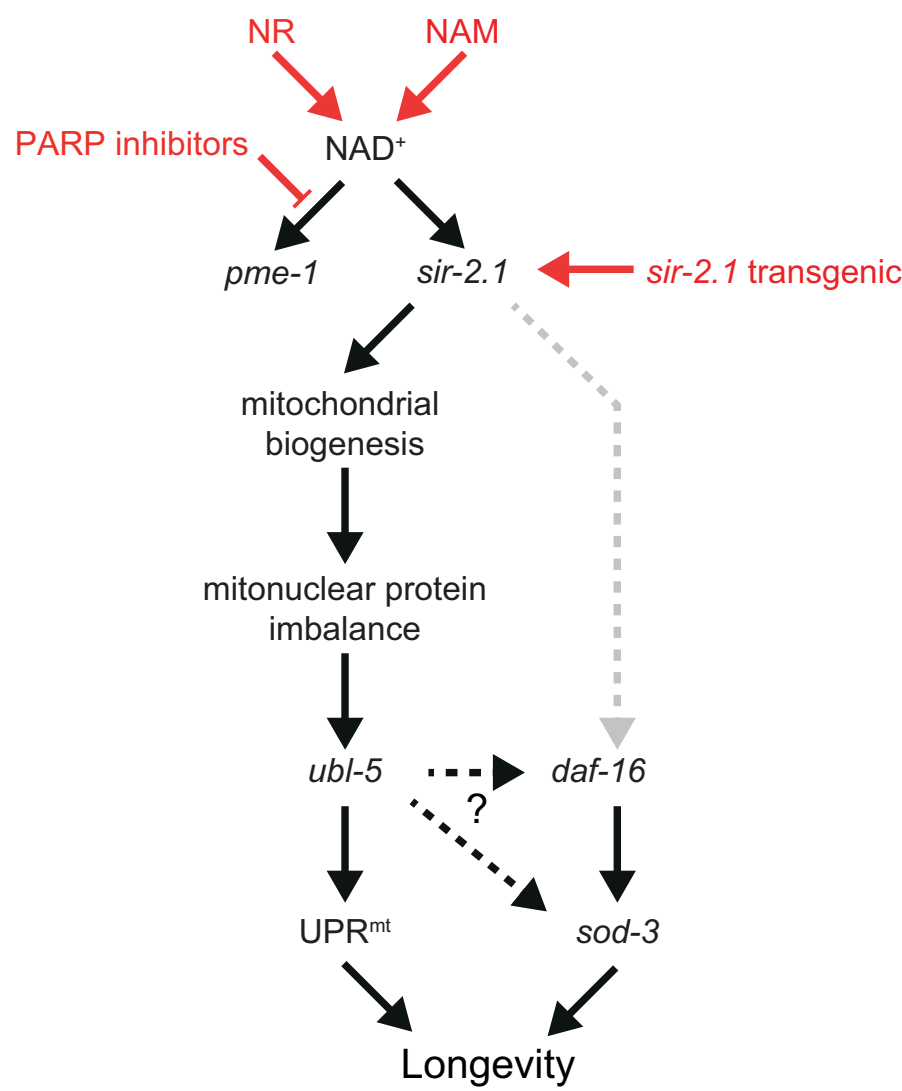

Supplement: NIHMS496383-supplement-02.pdf [file NIHMS496383-supplement-02.pdf]
